# Supplementary material for: On the role of nucleotides and lipids in the polymerization of the actin homolog MreB from a Gram-positive bacterium
Source: eLife journal article supplement (doi:10.7554/elife.84505), 2023-10-11

Fig 2- figure supplement 1

Semi-quantitative TEM methodology

- define 12 positions spread on the entire TEM grid (A)
- acquire images for each position (without looking around for polymers )
- record the presence and density of pairs or protofilaments, and classify as : - no polymers
  - + rare scattered polymers
  - ++ medium to high density of polymers

A

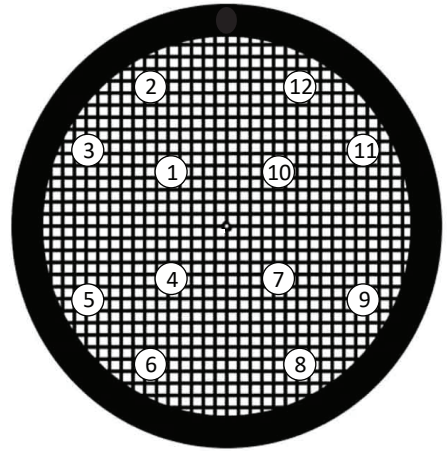

B

none  
(-)

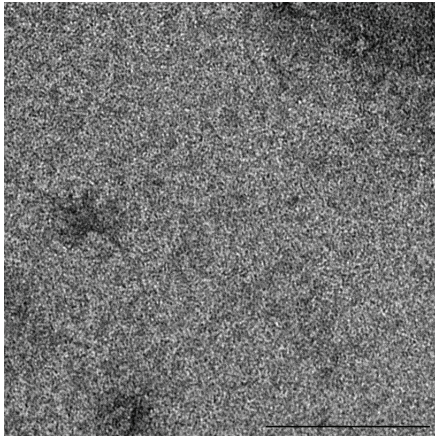

low density  
(+)

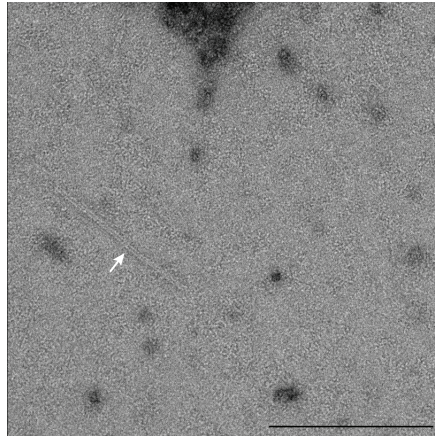

medium density  
(++)

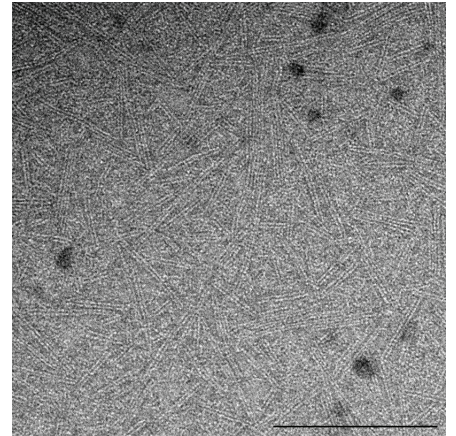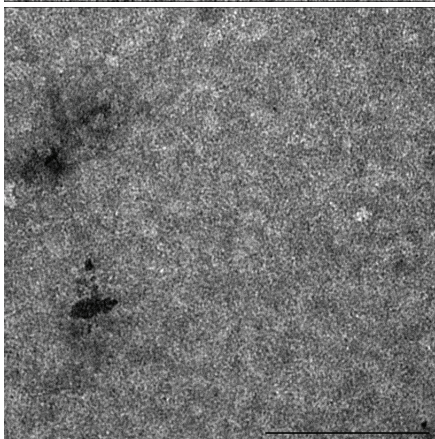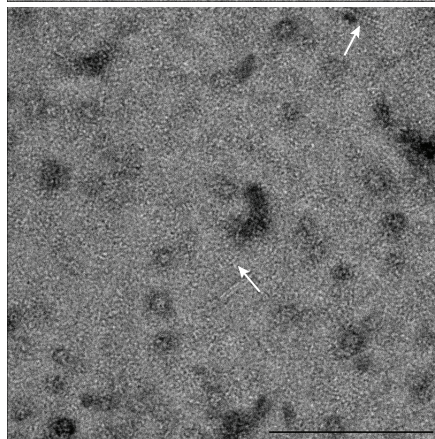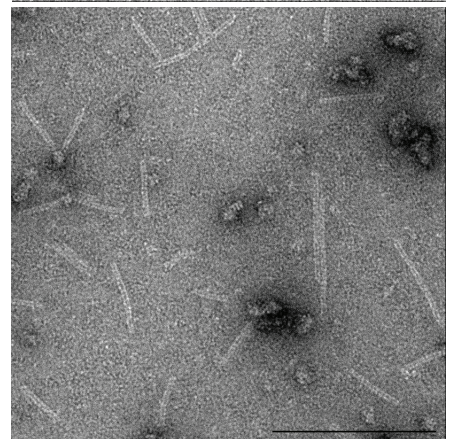

Supplement: supp [file elife-84505-supp-v1.zip]
