# Supplementary material for: On the role of nucleotides and lipids in the polymerization of the actin homolog MreB from a Gram-positive bacterium
Source: eLife. 2023 Oct 11;12:e84505. doi: 10.7554/eLife.84505 (PMC10718530; doi:10.7554/eLife.84505)
Supplement: Supplementary file 1. [file elife-84505-supp1.xlsx]

## Sheet: Sup. Tab crystallo
	Table S1. Data-collection and refinement statistics
		MreBGs (apo)	MreBGs-ATP 1
	Crystallographic data collection2
	X-ray source	PROXIMA 1 [09-11-2019]	PROXIMA 1 [09-11-2019]
	Wavelength (Å)	0.978565	0.978565
	Unit-cell parameters (Å, °)	a = 47.19	a = 57.74
		b = 62.01	b = 169.1
		c = 50.92	c = 43.88
		α = γ = 90	α = β = γ = 90
		β =112.98
	Space group	P21	P21212
	Resolution limits (Å)	46.87 – 1.8 (1.9- 1.8)	42.47– 2.29 (2.43-2.29)
	Number of observations	173786 (26497)	263907 (39495)
	Number of unique reflections	24968 (3960)	19996 (3130)
	R-meas (%)	15.0 (101.8)	14.6 (140.7)
	Completeness (%)	99.5 (98.2)	99.7 (98.0)
	I/σ (I)	7.21 (1.21)	12.41 (1.6)
	CC (1/2)	99.1 (75.9)	99.8 (84.3)
	Refinement
	Number of non-hydrogen atoms (Protein/other/water)	2497/16/127	2450/49/81
	R/Rfree (%)	19.1/23.4	20.7/25
	R.M.S.D. Bonds (Å)/angles (°)	0.008/0.96	0.008/0.895
	Average temperature factors (Protein/other/water)	32.8/36.8/37.1	58.9/57.9/56.8
	Ramachandran plot (%) (favored/ouliers)	98/0	98/1
	PDB code	7ZPT	8AZG
	1 co-crystal
	2 Values in parentheses refer to the highest resolution shell
