# Supplementary material for: On the role of nucleotides and lipids in the polymerization of the actin homolog MreB from a Gram-positive bacterium
Source: eLife. 2023 Oct 11;12:e84505. doi: 10.7554/eLife.84505 (PMC10718530; doi:10.7554/eLife.84505)
Supplement: Supplementary file 2. [file elife-84505-supp2.xlsx]

## Sheet: list conditions
	Table S2. List of polymerization conditions assayed
				KCl		[MreB]		lipids 2		nucleotides			Polymer 3
				(mM)		(µM)				type	(mM)
	Standard 1			100		1.34		+		ATP	2		+
	1 variable 4 :
		[KCl]		500									+
		[MreB]				6.7							+
						2.7							+
						1.09878							+
						0.824085							+/-
						0.54939							+/--
						0.274695							-
		Nucleotides								( - )	0		-
										ATP	25		+
										ATP	0.8		+
										ATP	0.5		+
										ATP	0.2		+
										ATP	0.05		+
										GTP			+
										GDP			-
										ADP			-
										ADP	50		-
										AMP-PNP			-
										AMP-PNP	50		-
										ApCpp			-
										ATP:AMP-PNP	1:1		+
										"	1:10		+
										"	1:25		-
		Mutant				ΔGLFA + ΔNter							-
						ΔNter							+
						ΔGLFA							+
		Lipids						( - )					-
								( - )*					-
		EM grid						( + )*					-
	2 variables:
		[MreB], nucl.				6.7				ADP			-
						6.7				AMPPNP			-
		[MreB], [KCl]		500		2.7							+
				500		0.55							-
				500		0.27							-
				50		0.55							-
		[KCl], nucl.		500						( - )	0		-
				500						GTP			+
				500						GDP			-
				500						ADP			-
				500						AMP			-
				500						ApCpp			-
		Mutant, [KCl]		500		ΔGLFA + ΔNter							-
				500		ΔNter							-
				500		ΔGLFA							+/-
		Lipids, nucl.								( - )	0		-
								( - )*		ADP			-
								( - )*		AMPPNP			-
		Lipids, [KCl]		500				( - )					-
		[MreB], lipids				6.87		( - )*					-
		Mutant, lipids				ΔGLFA + ΔNter		( - )*					-
						ΔNter		( - )*					-
						ΔGLFA		( - )*					-
	3 variables:
		Lipids, [MreB], nucl.				6.7		( - )*		ADP			+/-
						6.7		( - )*		AMPPNP			-
		Lipids, [KCl], nucl.		500				( - )		( - )	0		-
				500				( - )		GTP			-
		Lipids, [MreB], [KCl]		500		2.7		( - )					-
		1 standard polymerization conditions are: 2 mM ATP, 0,5 mg/ml lipids, 0,05 mg/ml MreB, in Tris - KCl - MgCl2 pH7 buffer
		2 ()* indicates that hydrophilic grids (glow discharged) were used.
		3 (+) presence, ( - ) absence or (+/-) low density of double protofilaments per field
		4 on the table are indicated only the variations to the standard condition
