# Supplementary material for: On the role of nucleotides and lipids in the polymerization of the actin homolog MreB from a Gram-positive bacterium
Source: eLife. 2023 Oct 11;12:e84505. doi: 10.7554/eLife.84505 (PMC10718530; doi:10.7554/eLife.84505)
Supplement: Supplementary file 3. [file elife-84505-supp3.xlsx]

## Sheet: Sup Table prots
	Table S3. Proteins used in this study
	name	MreBGs *			expression vector
	WT	MHHHHHH M1FGIGTKDLGI11	(…) K94GLFAGK100	(…)	pCC110
	ΔNter	MHHHHHH M1DLGI11	(…) K94GLFAGK100	(…)	pCC116
	ΔGLFA	MHHHHHH M1FGIGTKDLGI11	(…) K94GK100	(…)	pCC117
	ΔNter	MHHHHHH M1DLGI11	(…) K94GK100	(…)	pCC115
		*numbering of aminoacids refers to MreBGs wt sequence
