# Supplementary material for: On the role of nucleotides and lipids in the polymerization of the actin homolog MreB from a Gram-positive bacterium
Source: eLife. 2023 Oct 11;12:e84505. doi: 10.7554/eLife.84505 (PMC10718530; doi:10.7554/eLife.84505)
Supplement: Supplementary file 4. [file elife-84505-supp4.xlsx]

## Sheet: Sup Table Strain
	Table S4. Strains used in this study
	Strain	Relevant genotype	information	Source or reference1
	G. stearothermophilus
	ATCC 7953	wild type isolate		BGSC (Ref. W9A12)
	E. coli
	T7 express	F- λ- fhuA2 [lon] ompT lacZ::T7 gene1 gal sulA11 Δ(mcrC-mrr)114::IS10 R(mcr-73::miniTn10-TetS)2 R(zgb-210::Tn10)(TetS) endA1 [dcm]	expression strain carrying the T7 RNA polymerase gene into the lacoperon, allowing controlled IPTG-induced expression of a gene of interest	New England Biolabs
	EcRCL2	pET28a	replicative plasmid pET28a(+) (Novagen) allowing IPTG-induction of a gene of interest; in DH10b	lab collection
	EcRCL212	pCC110::(mreBGs)	pET28a(+) derivative carrying a wild type copy of mreBGs under control of the T7 promoter	pCC110 → T7 express
	EcRCL243	pCC115::(mreBGsδ 2->7;δGLFA)	pCC110 derivative carrying a copy of mreBGs deleted for codons 2-7 (FGIGTK) and 102-105 (GLFA)	pCC115 → T7 express
	EcRCL244	pCC116::(mreBGs δ 2->7)	pCC110 derivative carrying a copy of mreBGs deleted for codons 2-7 (FGIGTK)	pCC116 → T7 express
	EcRCL245	pCC117::(mreBGsδGLFA)	pCC110 derivative carrying a copy of mreBGs deleted for codons 102-105 (GLFA)	pCC117 → T7 express
	1: Arrows indicate construction by transformation with chromosomal or plasmidic DNA
