# Supplementary material for: On the role of nucleotides and lipids in the polymerization of the actin homolog MreB from a Gram-positive bacterium
Source: eLife. 2023 Oct 11;12:e84505. doi: 10.7554/eLife.84505 (PMC10718530; doi:10.7554/eLife.84505)
Supplement: Supplementary file 5. [file elife-84505-supp5.xlsx]

## Sheet: Sup Tab oligos
	Table S5. Oligonucleotides used in this study
	name	sequence	use
	cc430	CCATGCATCATCACCATCATCACATGTTTGGGATTGGAACGAAAGA	construction of pCC110
	cc431	CGGAGCTCGAATTCGGATCCTCAGCGATGGTCTCTCGCCTT	"
	cc432	TCTTTCGTTCCAATCCCAAACATGTGATGATGGTGATGATGCATGG	"
	cc433	AAGGCGAGAGACCATCGCTGAGGATCCGAATTCGAGCTCCG	"
	cc582	CATCACCATCATCACATGGATCTTGGGATCGATTTAGGGAC	construction of pCC116, pCC115
	cc583	CCAAGATCCATGTGATGATGGTGATGATGCAT	"
	cc584	CAAGACGAAGGGCAAGCCGTATGTGATGG	construction of pCC117, pCC115
	cc585	ACGGCTTGCCCTTCGTCTTGATGGCTTTGCGAAT	"
