# Supplementary figures and images for: On the role of nucleotides and lipids in the polymerization of the actin homolog MreB from a Gram-positive bacterium
Source: eLife journal article supplement (doi:10.7554/elife.84505), 2023-10-11

Figure 4 - figure supplement 2

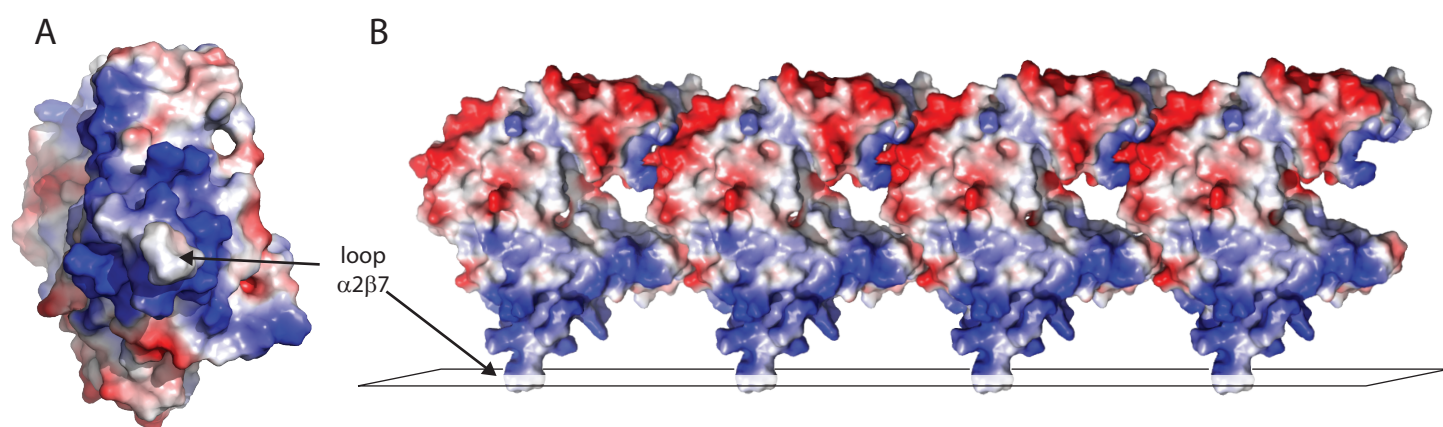

Supplement: supp [file elife-84505-supp-v1.zip]

Fig. 2 - figure supplement 2

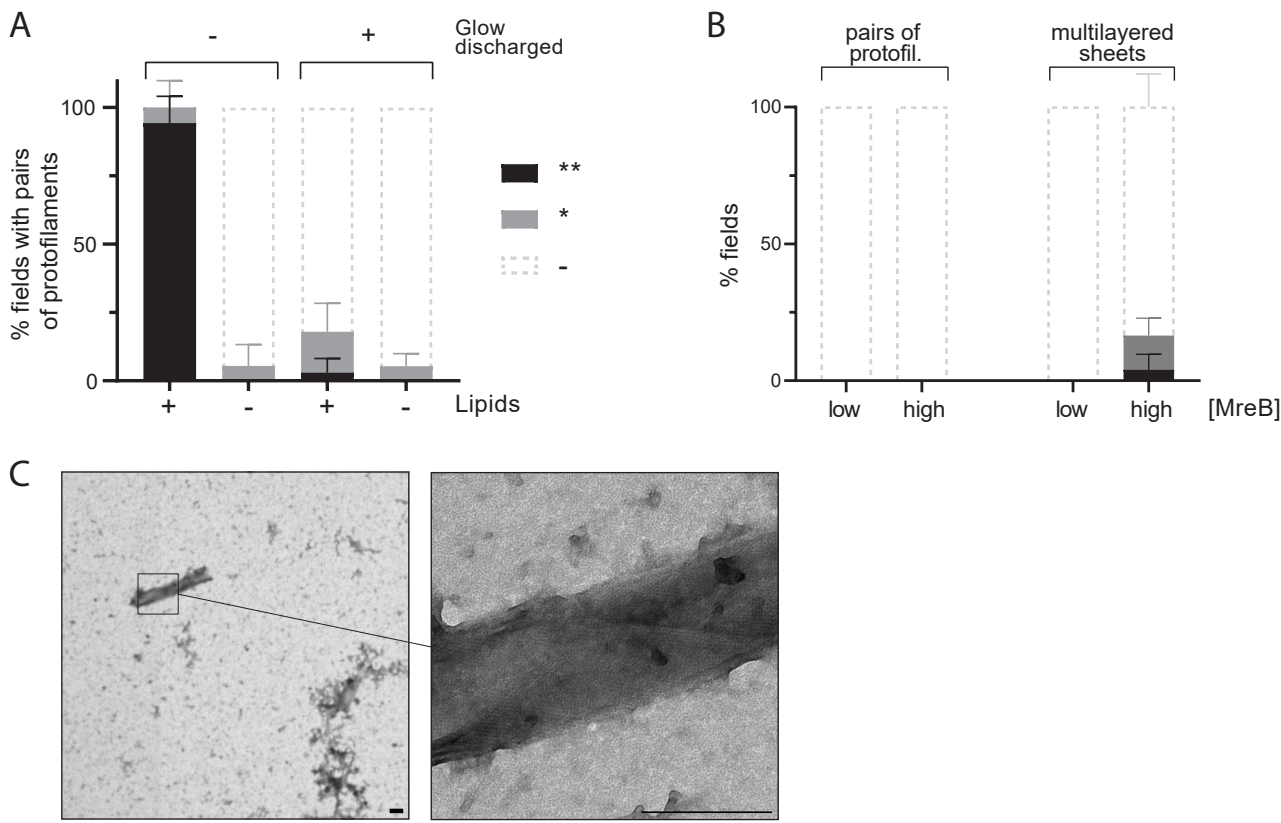

Supplement: supp [file elife-84505-supp-v1.zip]

Figure 3 - figure supplement 3

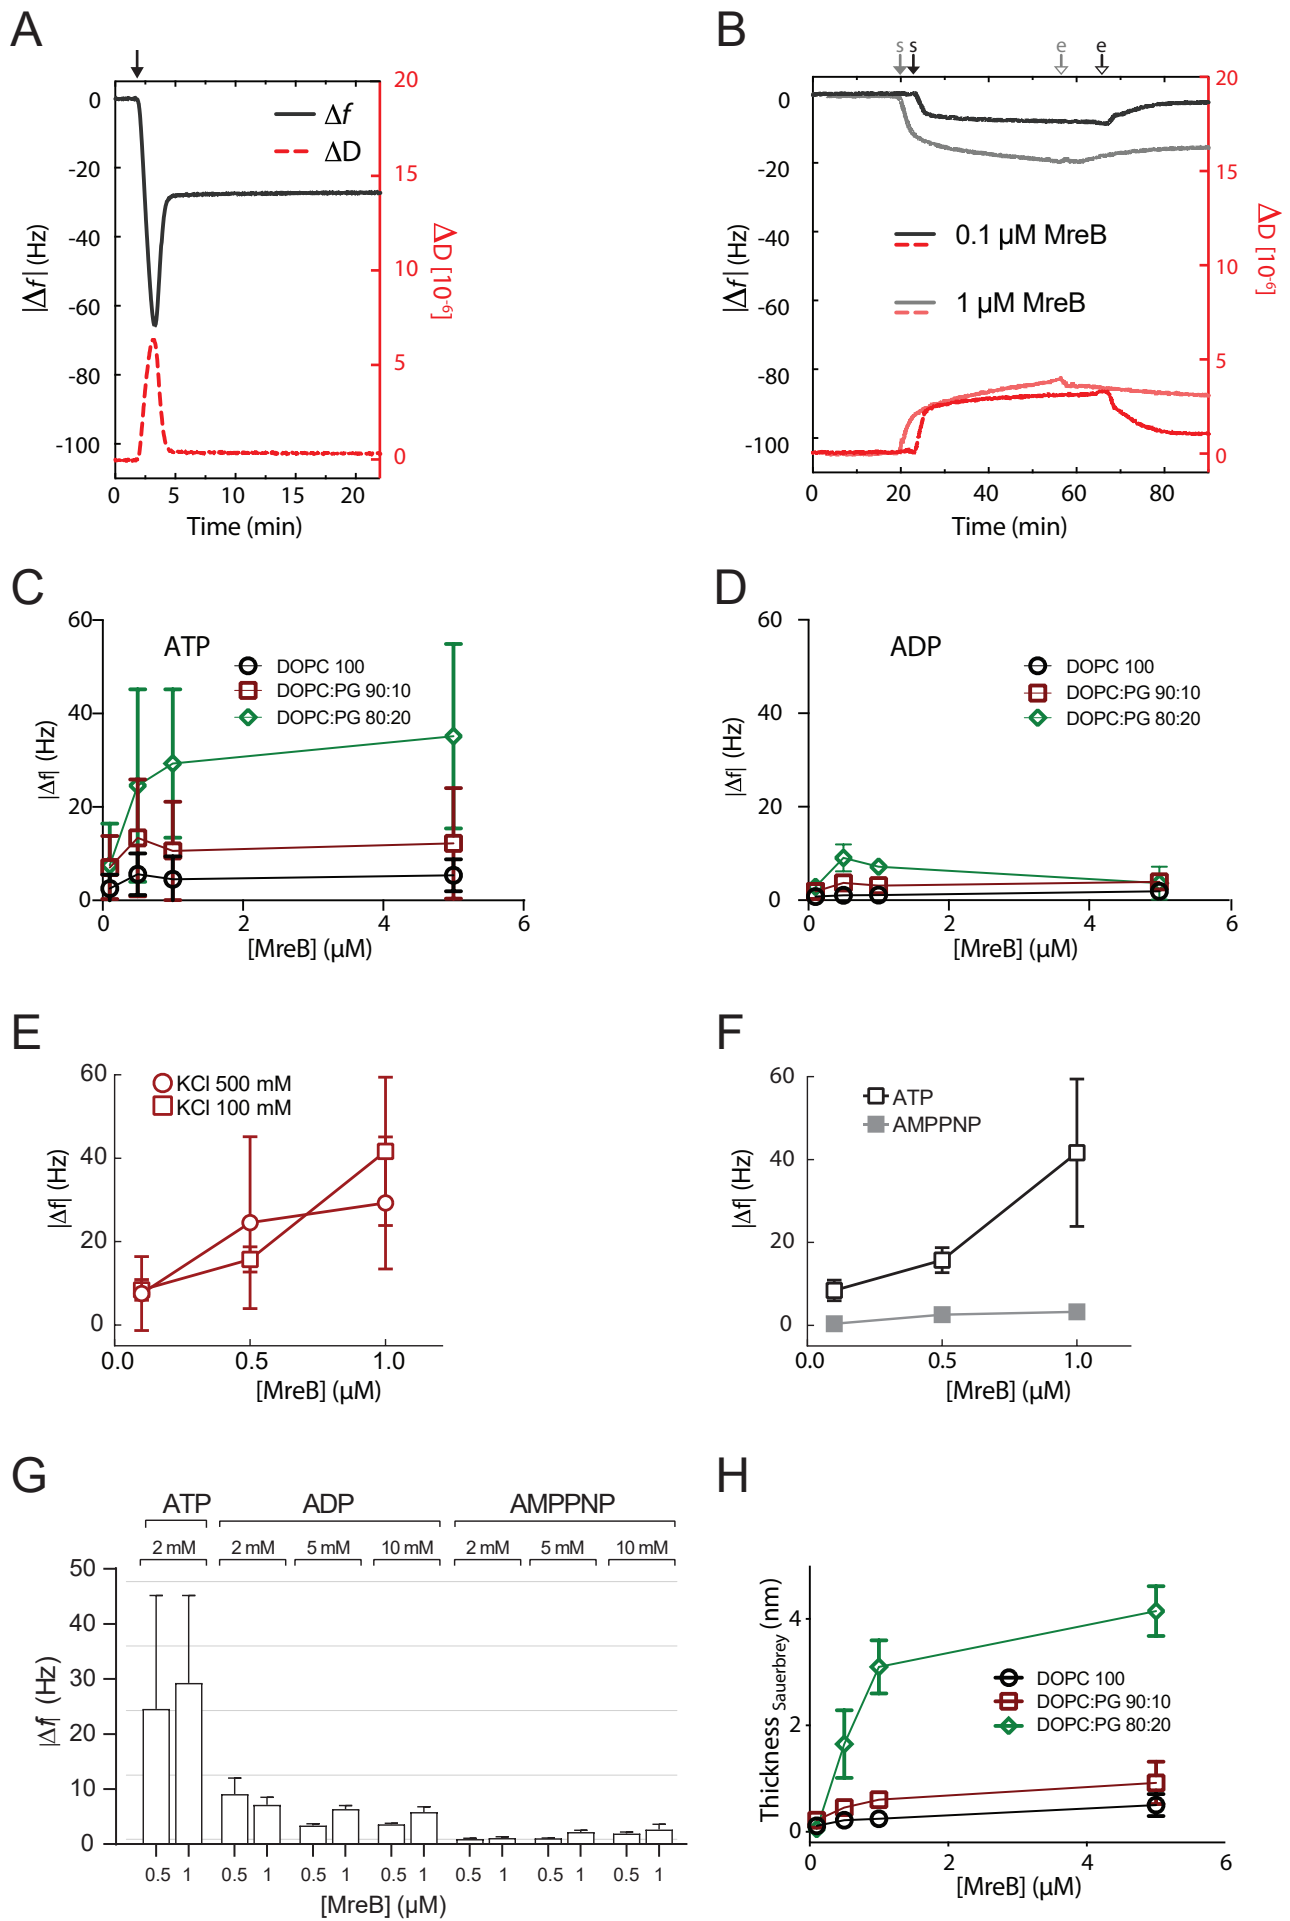

Supplement: supp [file elife-84505-supp-v1.zip]

Figure 2 - figure supplement 4

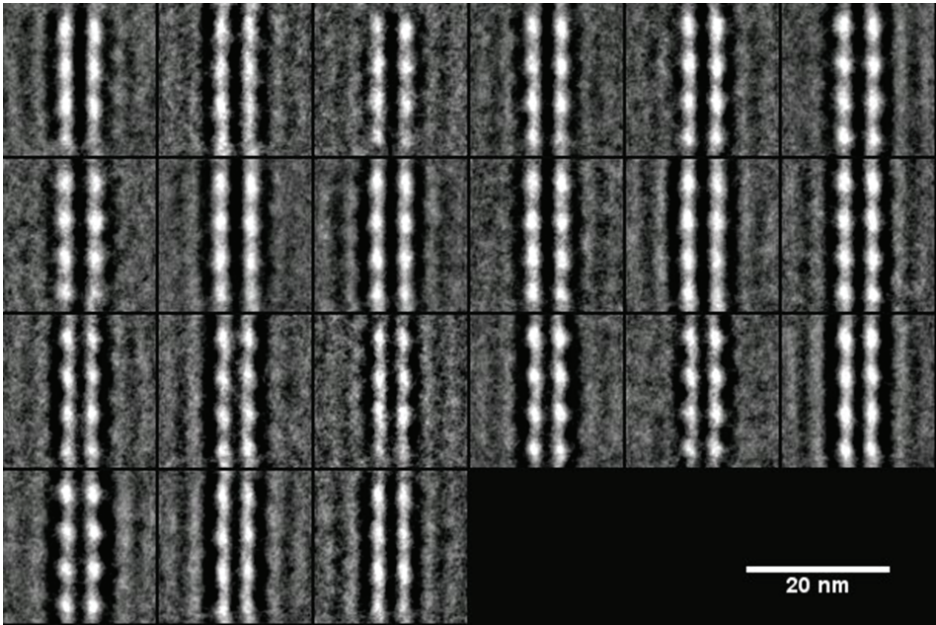

Supplement: supp [file elife-84505-supp-v1.zip]

Figure 3 - figure supplement 1

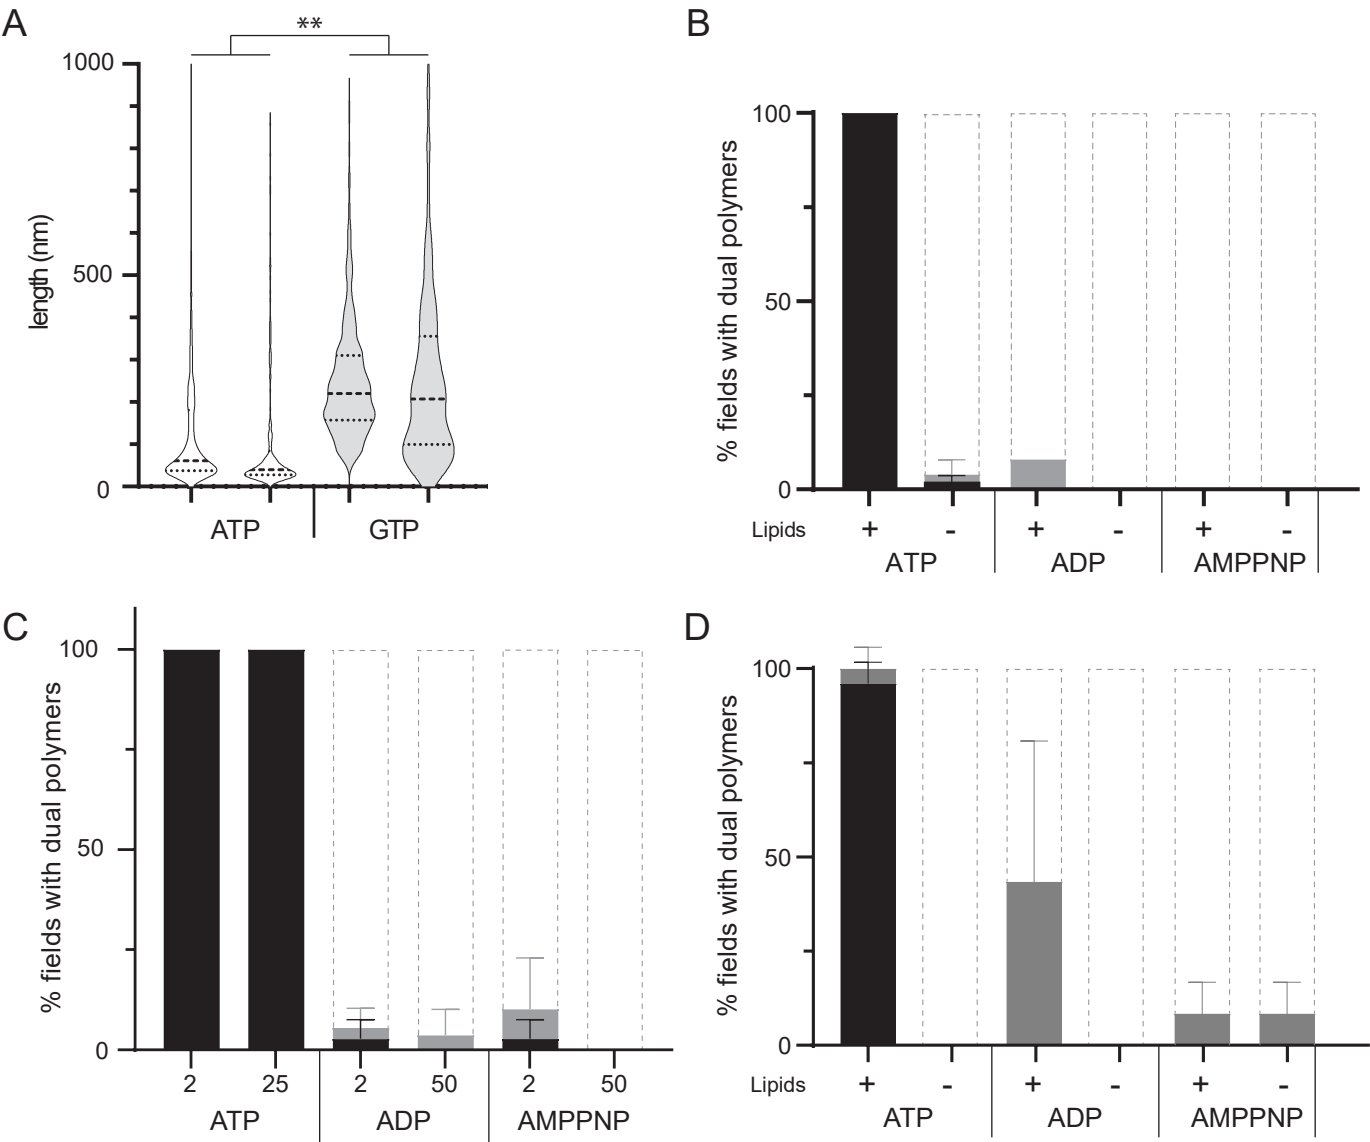

Supplement: supp [file elife-84505-supp-v1.zip]

Figure 2 - figure supplement 5

**A** Liposomes (alone)

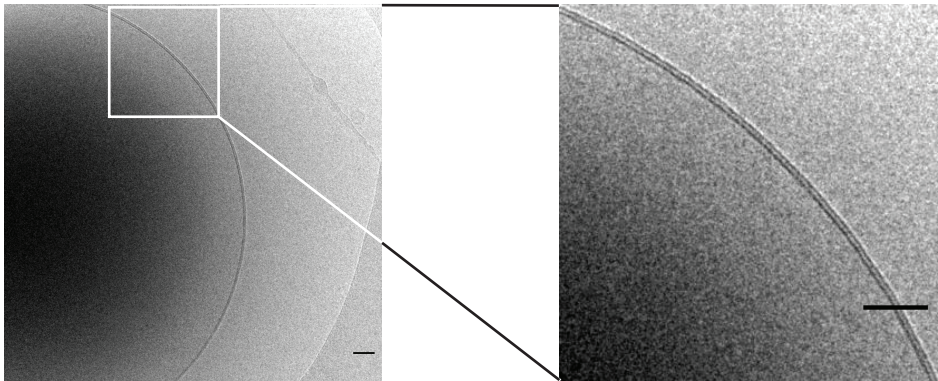

**B** Liposomes + MreB (100 mM KCl)

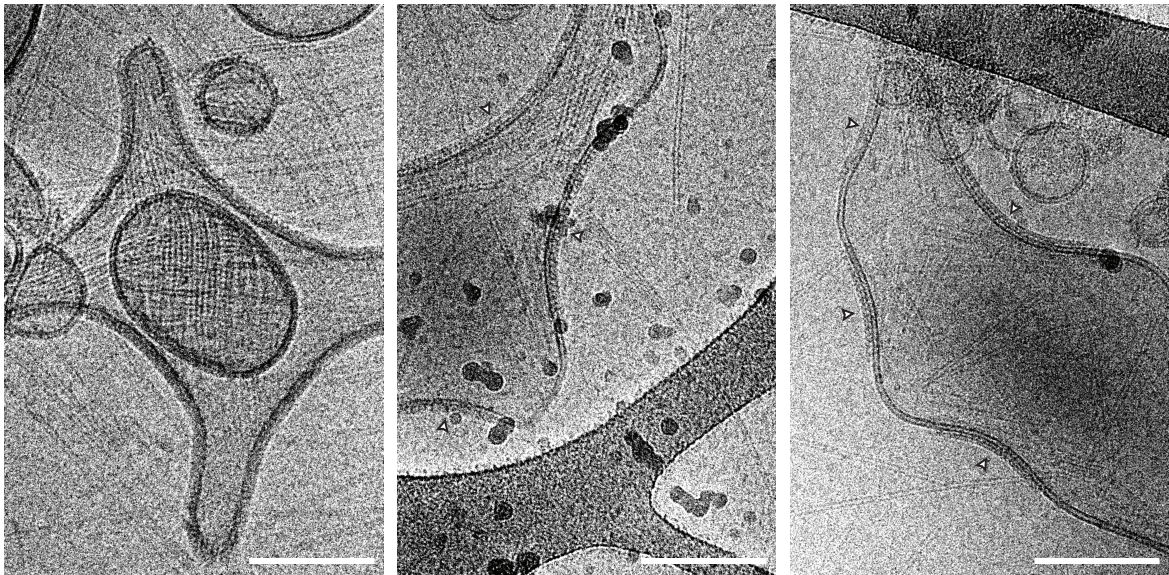

**C** Liposomes + MreB (500 mM KCl)

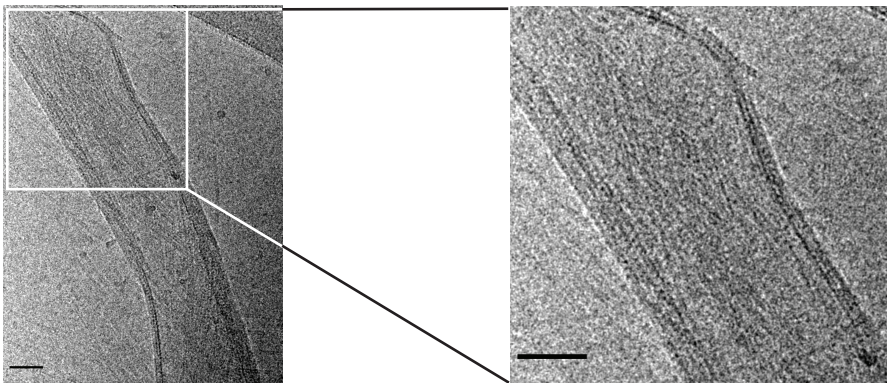

Supplement: supp [file elife-84505-supp-v1.zip]

Figure 4 - figure supplement 3

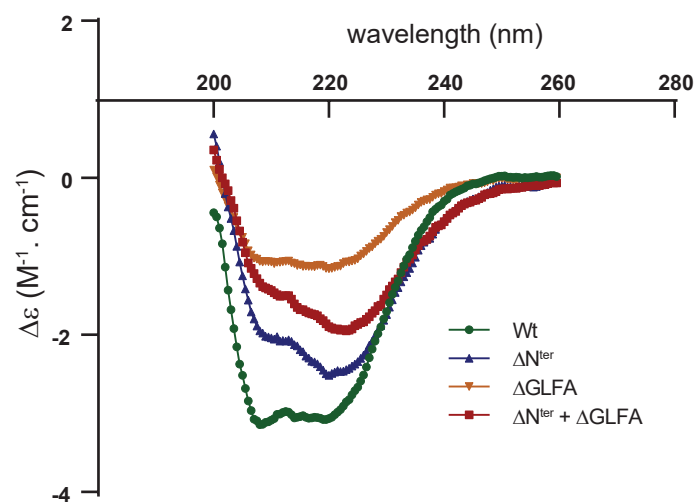

Supplement: supp [file elife-84505-supp-v1.zip]

Figure 4 - figure supplement 1

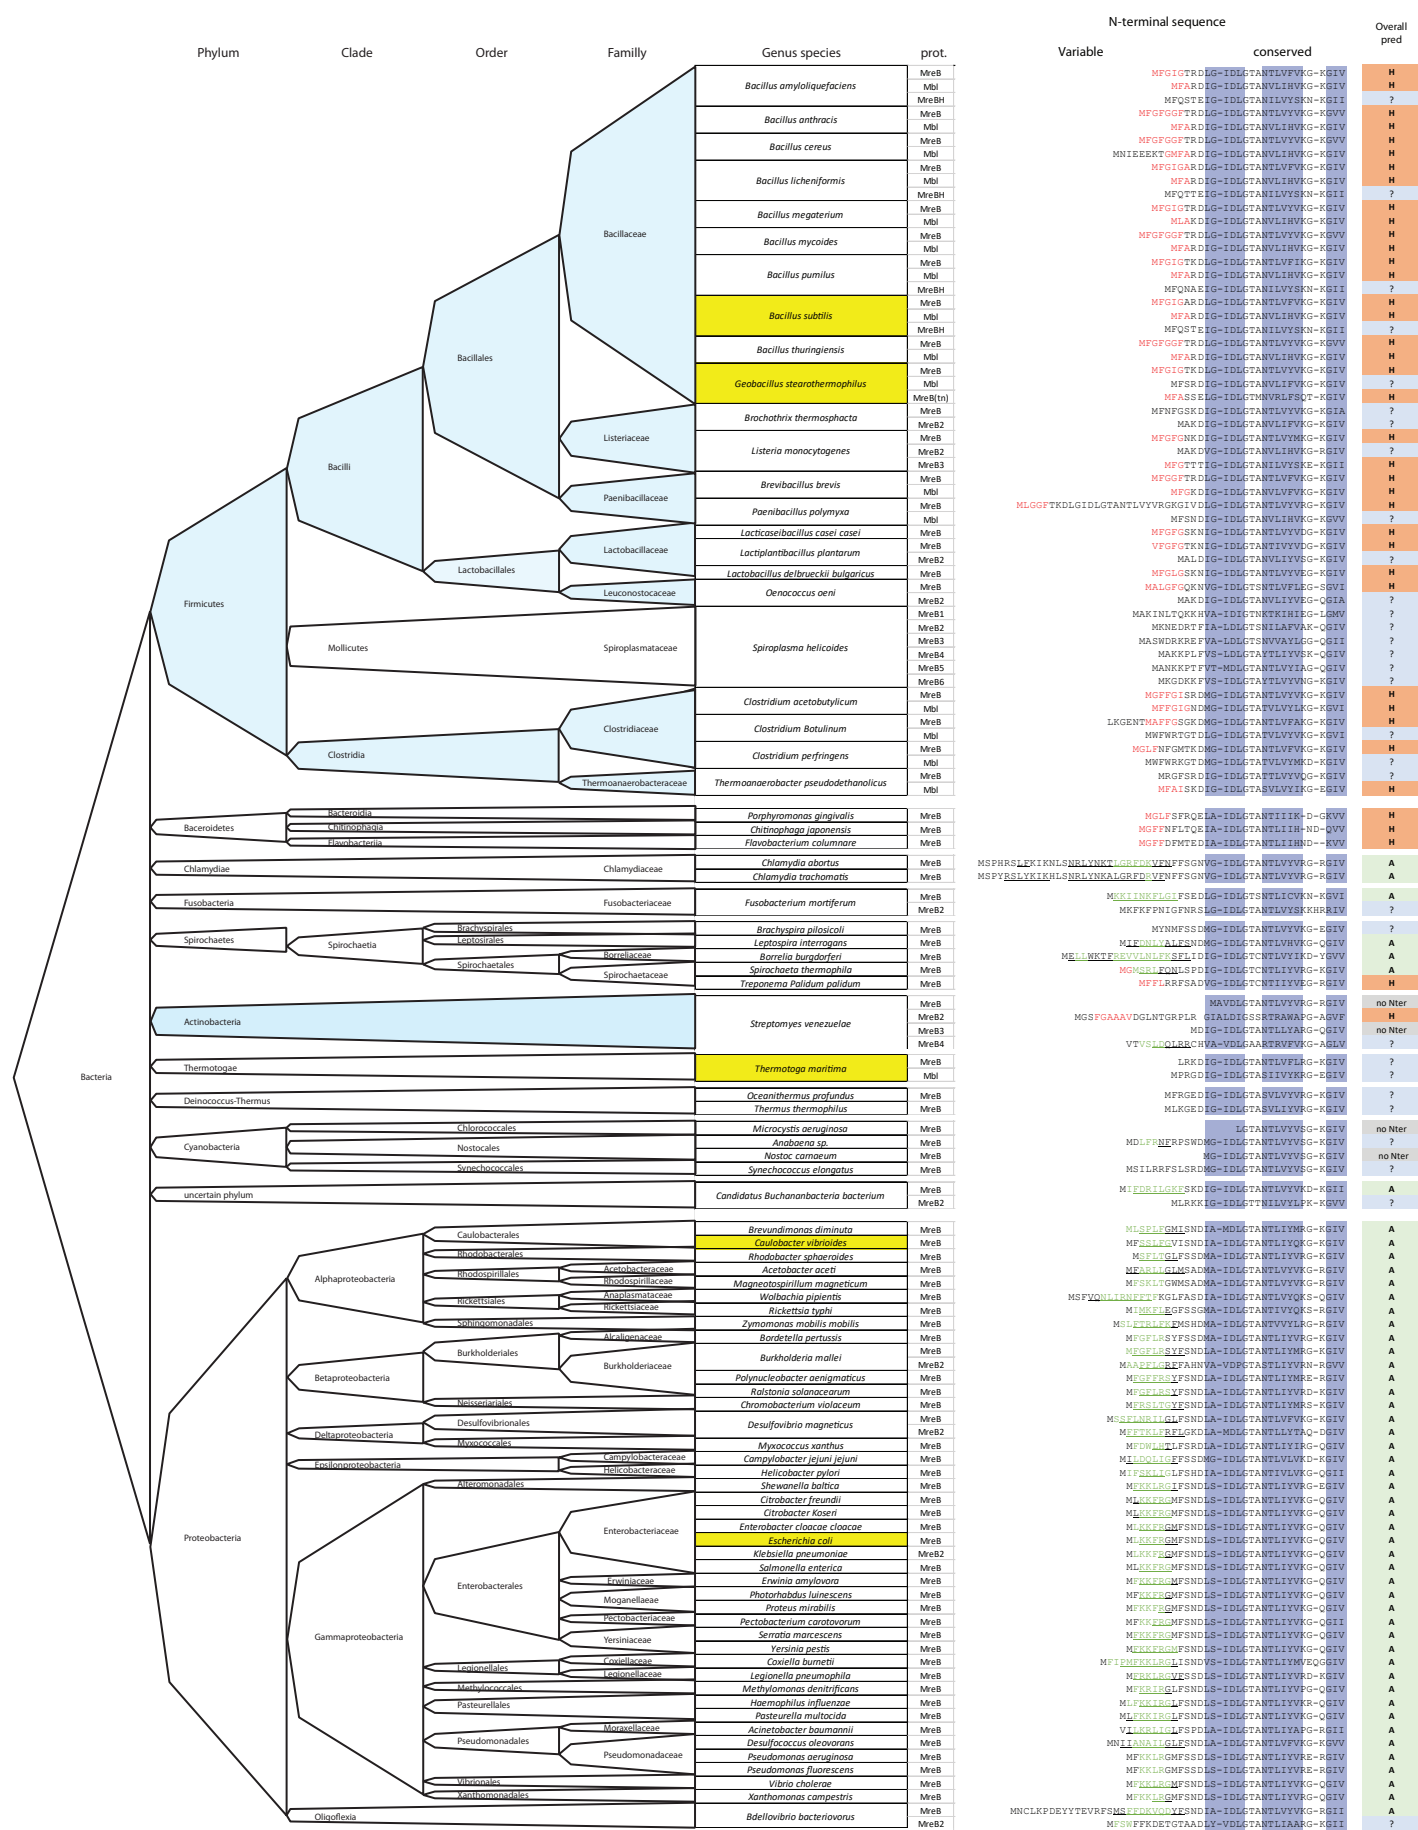

Supplement: supp [file elife-84505-supp-v1.zip]

Figure 3 - figure supplement 2

A

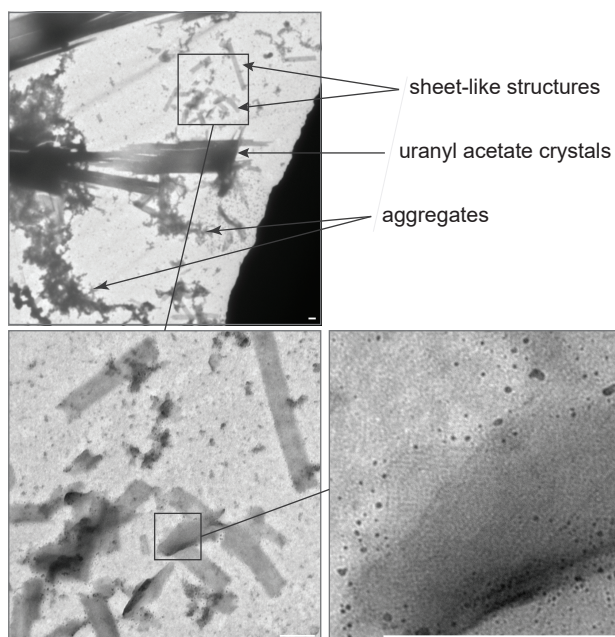

B

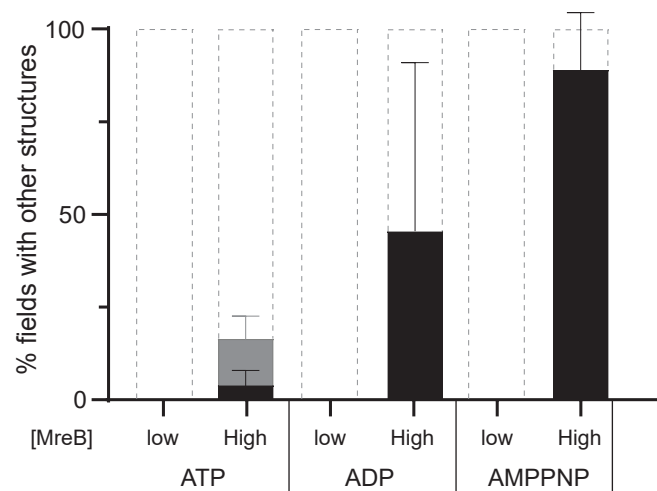

C

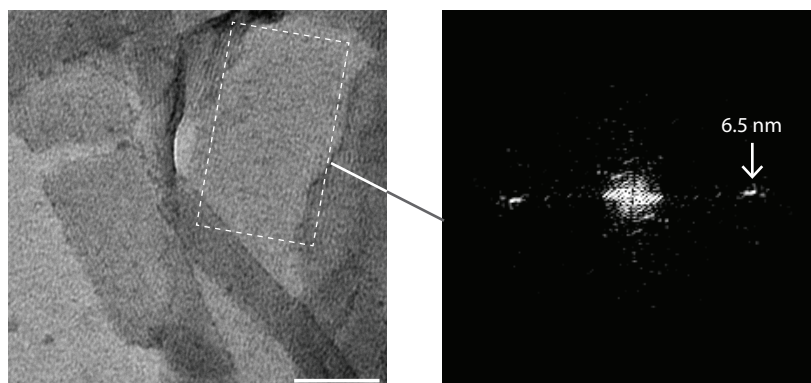

Supplement: supp [file elife-84505-supp-v1.zip]

Figure 5- figure supplement 1

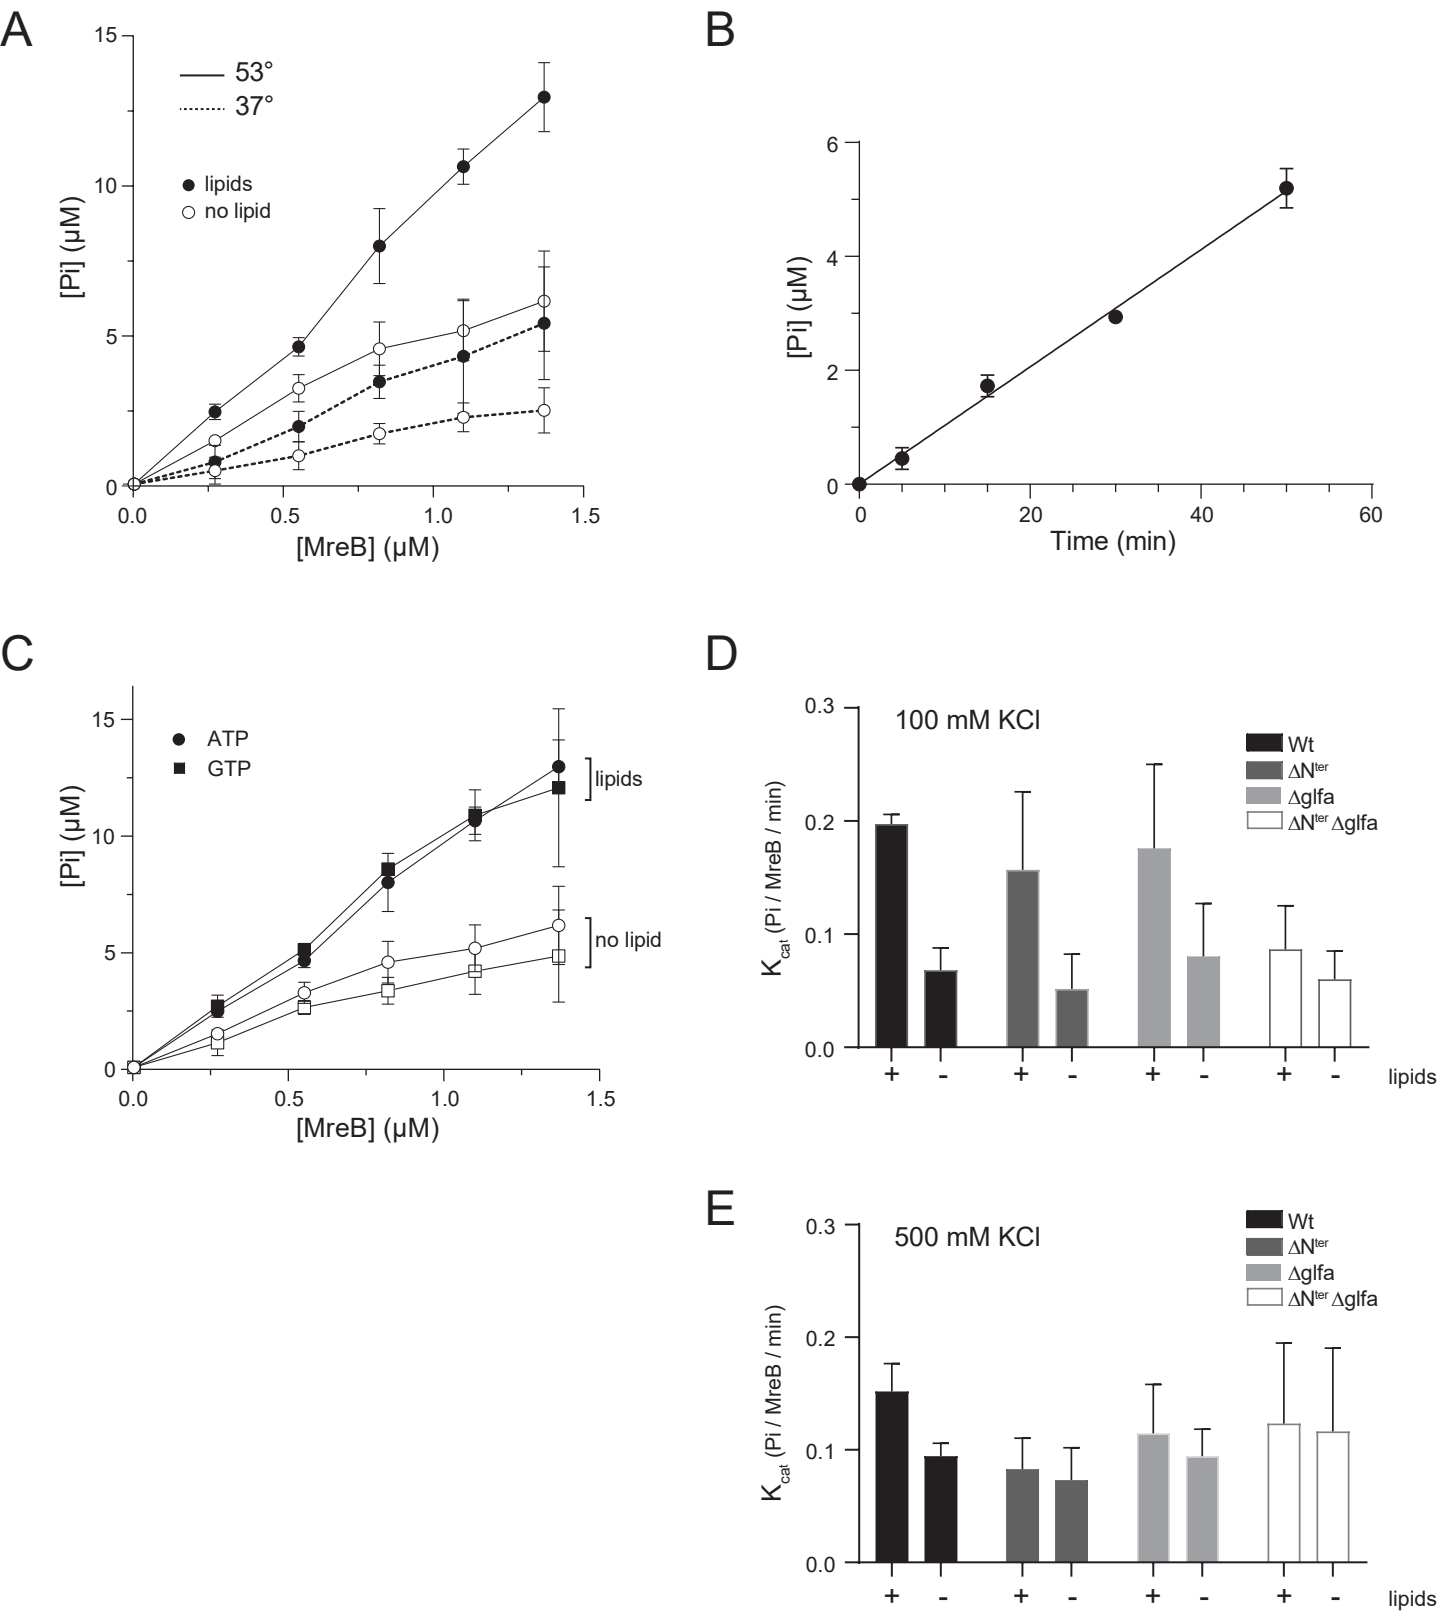

Supplement: supp [file elife-84505-supp-v1.zip]

Figure 1 - figure supplement 2

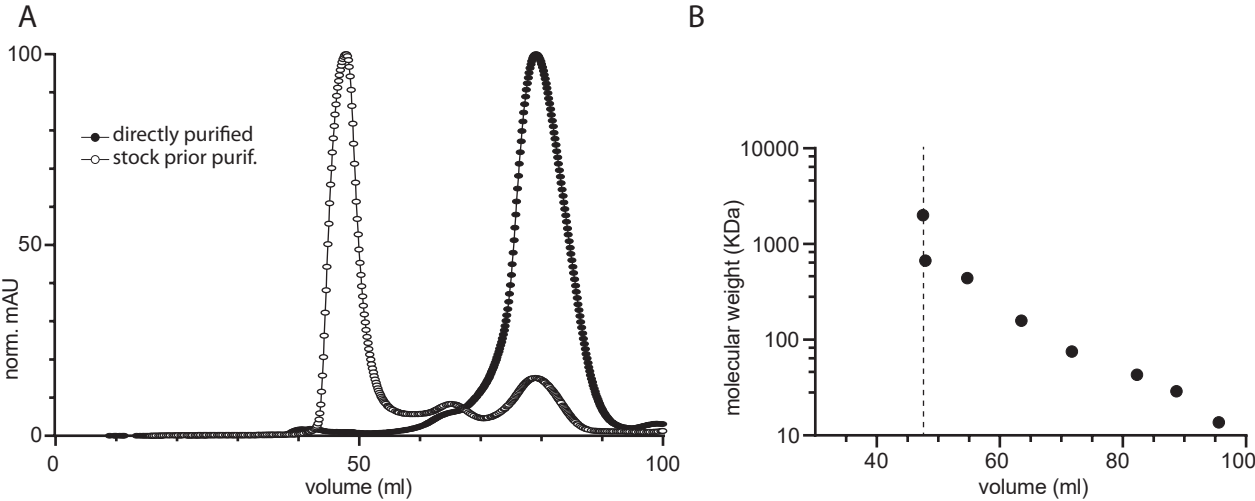

Supplement: supp [file elife-84505-supp-v1.zip]

Fig. S1

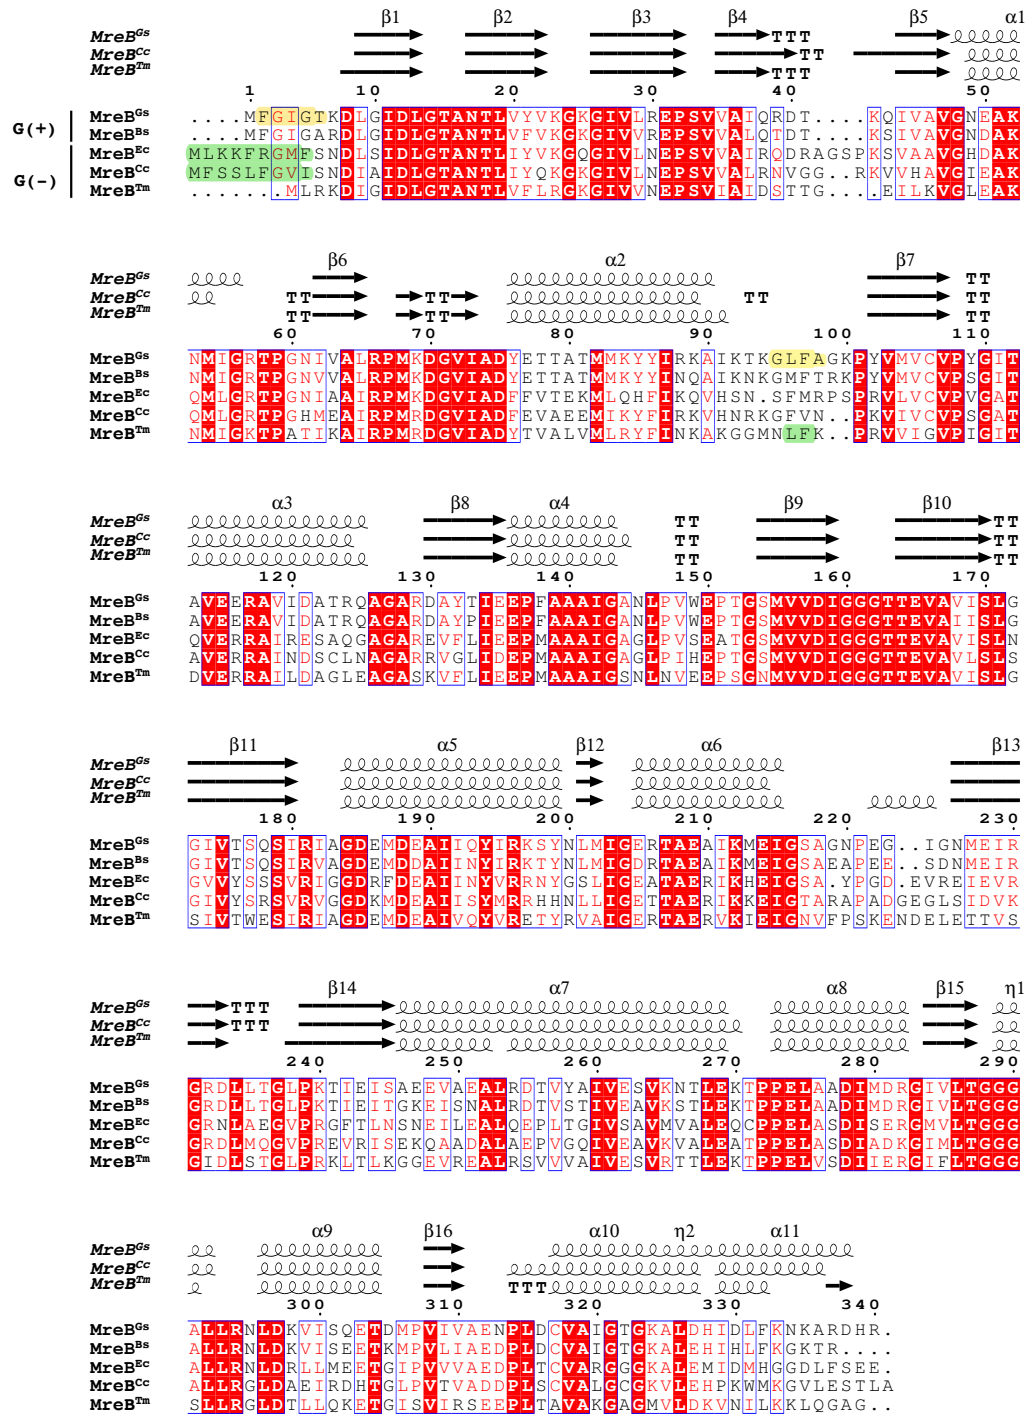

Supplement: supp [file elife-84505-supp-v1.zip]

Figure 4 - figure supplement 4

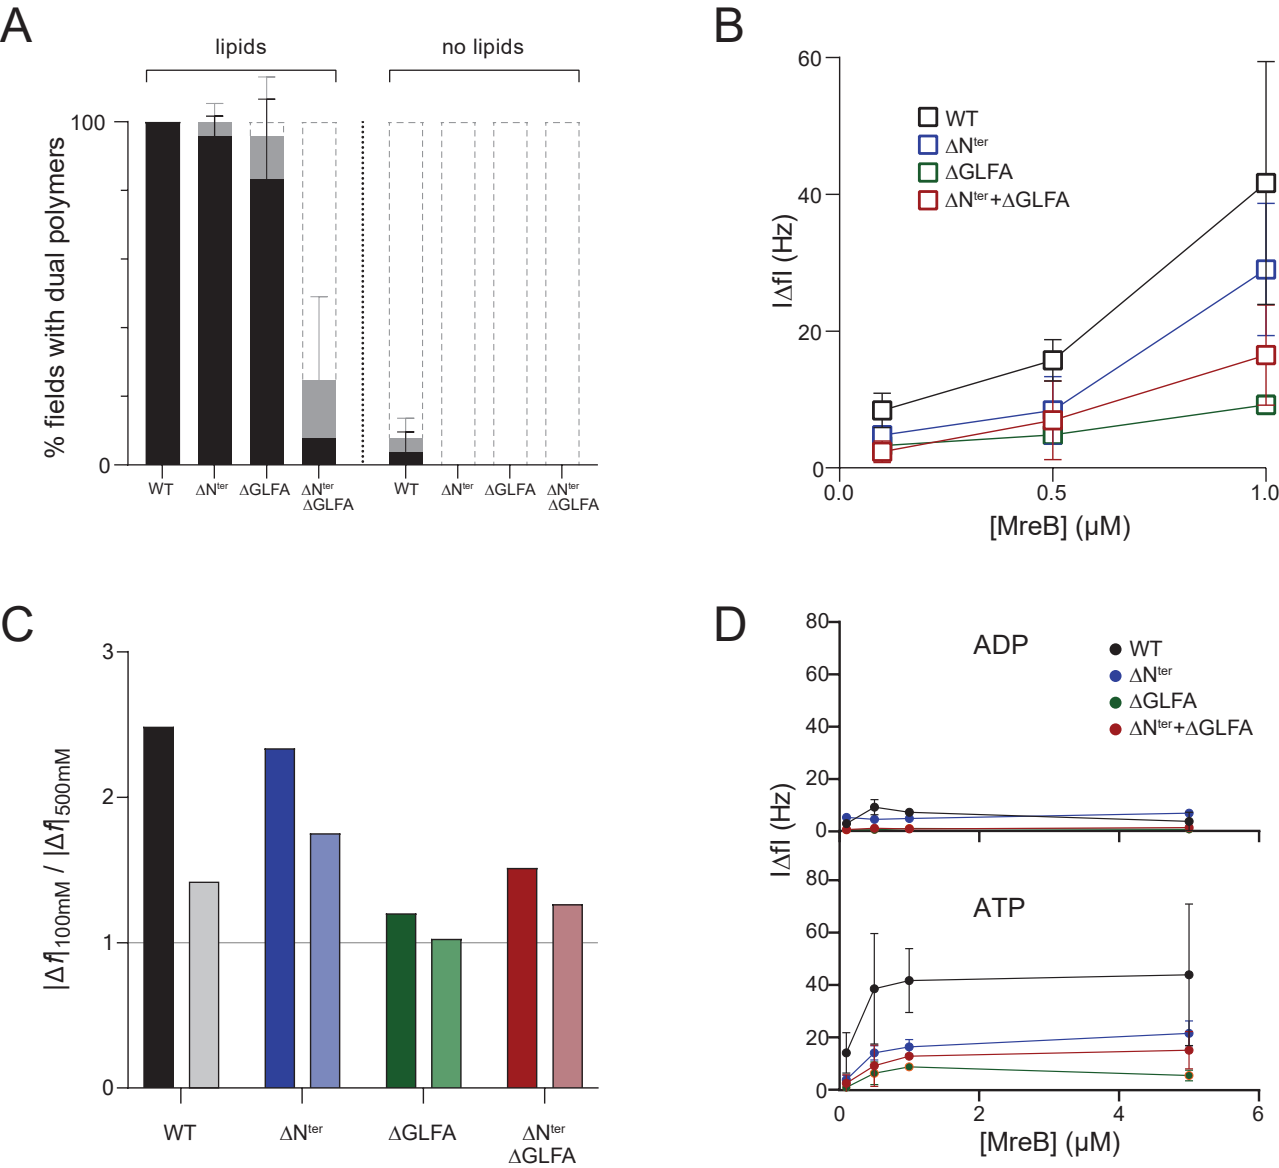

Supplement: supp [file elife-84505-supp-v1.zip]

Figure 4 - figure supplement 5

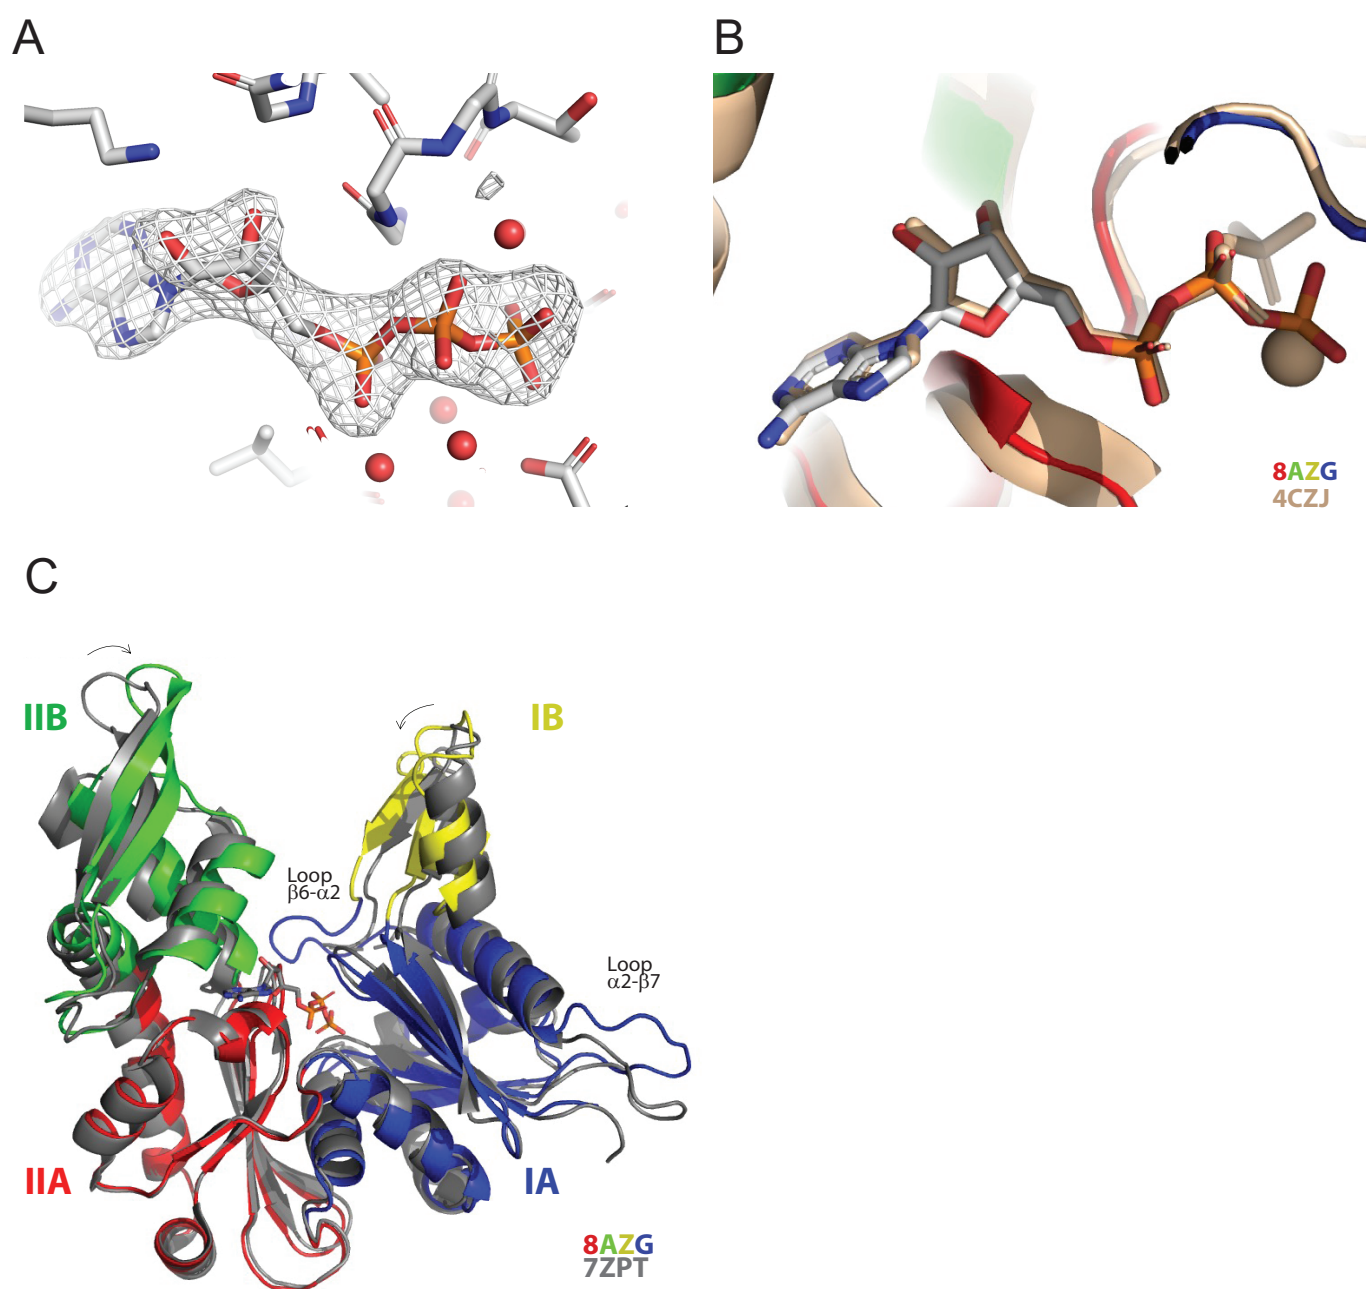

Supplement: supp [file elife-84505-supp-v1.zip]

Figure 2 - figure supplement 3

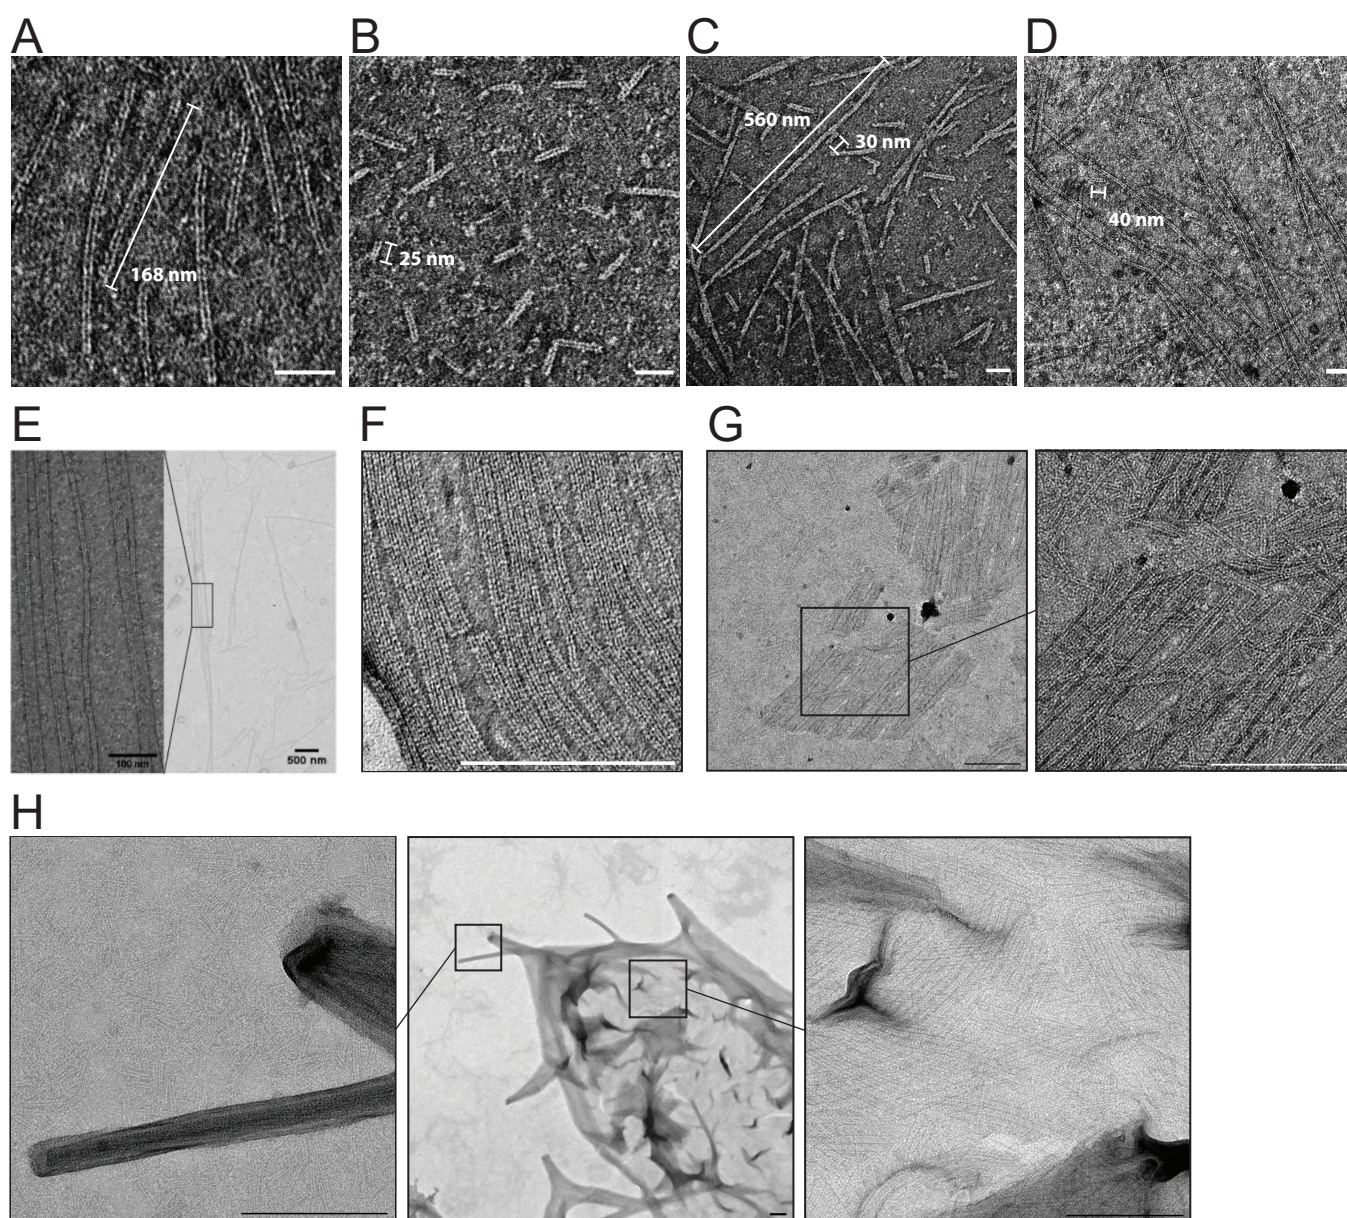

Supplement: supp [file elife-84505-supp-v1.zip]
